# Supplementary material
Source: publisher figshare collection journal article supplement (https://acs.figshare.com/ndownloader/files/3816031)
Supplement: Supplementary file 1 [file 3816031]

## Supporting Information

### Detection and Characterization of SiO<sub>2</sub> and TiO<sub>2</sub> Nanostructures in Dietary Supplements

Jin-Hee Lim<sup>1\*</sup>, Patrick Sisco<sup>1</sup>, Thilak K. Mudalige<sup>1</sup>, Germanie Sánchez-Pomales<sup>1</sup>, Paul C. Howard<sup>2</sup>, and  
Sean W. Linder<sup>1\*</sup>

<sup>1</sup>Office of Regulatory Affairs, Arkansas Regional Laboratory, U.S. Food and Drug Administration, 3900  
NCTR Road, Jefferson, Arkansas 72079, United States

<sup>2</sup>National Center for Toxicological Research, Office of Scientific Coordination, U.S. Food and Drug  
Administration, 3900 NCTR Road, Jefferson, Arkansas 72079, United States

Email Address: [Jin.Lim@fda.hhs.gov](mailto:Jin.Lim@fda.hhs.gov) Phone: +1-870-543-4660 Fax: +1-870-543-4041

Email Address: [Sean.Linder@fda.hhs.gov](mailto:Sean.Linder@fda.hhs.gov) Phone: +1-870-543-4667 Fax: +1-870-543-4041

## Supporting Information

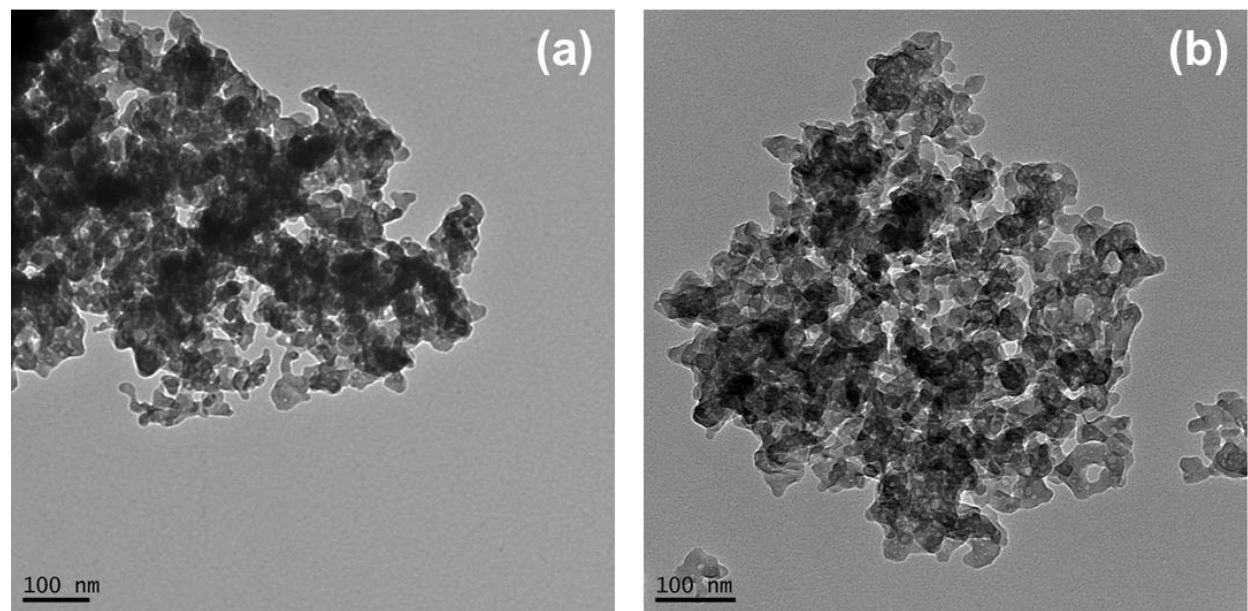

**Figure SI1.** TEM images of commercial SiO<sub>2</sub> nanoparticles: (a) before digestion and (b) after digestion in a mixture of H<sub>2</sub>O<sub>2</sub> and HNO<sub>3</sub> at 120 °C.

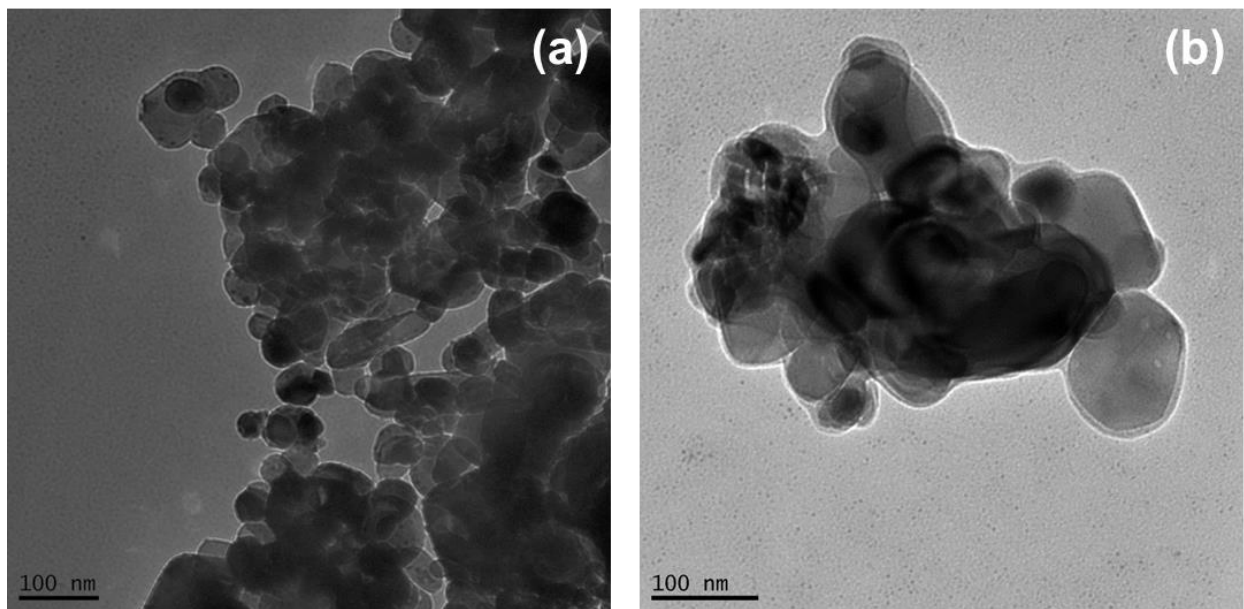

**Figure SI2.** TEM images of commercial  $\text{TiO}_2$  nanoparticles: (a) before digestion and (b) after digestion in a mixture of  $\text{H}_2\text{O}_2$  and  $\text{HNO}_3$  at  $120\text{ }^\circ\text{C}$ .

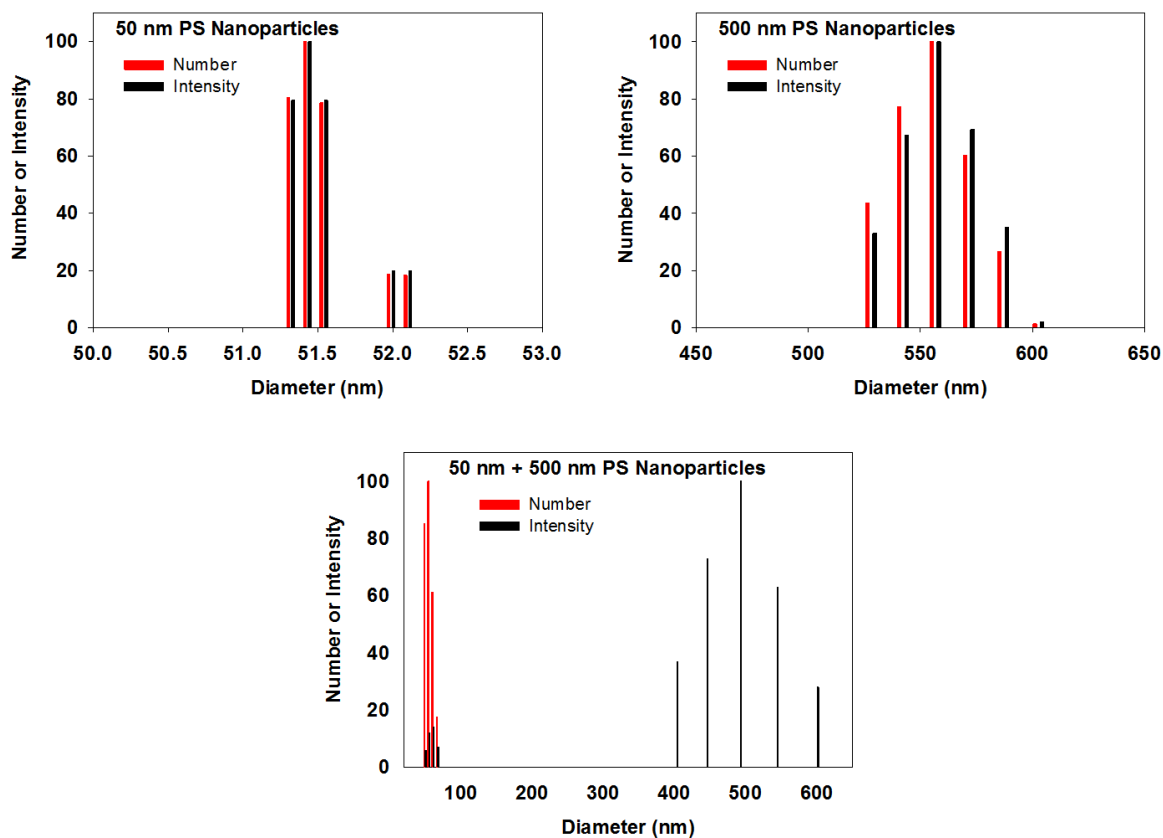

|                               | PS 50 nm | PS 500 nm | PS 50 nm + 500 nm |
|-------------------------------|----------|-----------|-------------------|
| Number based particle size    | 51.5 nm  | 554.8 nm  | 55.5 nm           |
| Intensity based particle size | 51.5 nm  | 557.6 nm  | 442.0 nm          |
| Smallest particle size        | 51.3 nm  | 528.0 nm  | 49.8 nm           |
| Polydispersity                | 0.01     | 0.05      | 0.34              |

**Figure SI3.** DLS data of polystyrene (PS) standard nanoparticles with diameter of 50 nm, 500 nm, and mixture of 50 nm and 500 nm (1:1 volume ratio).

63 **Table SII.** Experimentally determined Si and Ti contents per capsule or tablet.

| Sample | Si (mg/ per capsule or tablet) | Ti (mg/ per capsule or tablet) |
|--------|--------------------------------|--------------------------------|
| DS-1   | 8.94                           | 5.25                           |
| DS-2   | 12.1                           | 2.95                           |
| DS-3   | 3.08                           | 0                              |
| DS-4   | 0.266                          | 0.228                          |
| DS-5   | 5.02                           | 0.606                          |
| DS-6   | 2.40                           | 0                              |
| DS-7   | 1.60                           | 0                              |
| DS-8   | 0                              | 0.468                          |
| DS-9   | 4.51                           | 0                              |
| DS-10  | 3.26                           | 1.55                           |
| DS-11  | 2.93                           | 0                              |
| DS-12  | 12.6                           | 5.63                           |

64

65 The concentration of Si and Ti of each product was experimentally determined by ICP-MS. Nitric acid

66 (HNO<sub>3</sub>, Optima 67-70%) and hydrofluoric acid (HF, Optima 47-51%) were purchased from Fisher

67 Scientific (Houston, TX, USA). 10 ppm silicon (Si), titanium (Ti), and scandium (Sc) standard solutions

68 were purchased from Inorganic Venture (Christiansburg, VA, USA), and used to prepare standard

69 calibration solutions for ICP-MS measurements, where Sc was used as an internal standard. Si and Ti

70 standard solutions (1000 ppm) used to prepare an initial calibration verification (ICV) sample were

71 acquired from Ultra Scientific (N. Kingstown, RI, USA) and Spex CertiPre group (Metuchen, NG, USA),

72 respectively. To determine a total Si and Ti concentration, dietary supplements were first digested using a

73 CEM (Matthews, NC, USA) MARS-Xpress microwave digester (maximum power: 1600 W). The tablets

74 or capsules for each sample were suspended in 20 mL of 2.5% HNO<sub>3</sub> solution and allowed to dissolve

overnight. 100  $\mu$ L of suspended material, 2 mL  $\text{HNO}_3$  and 200  $\mu$ L HF were transferred into a digestion vessel. Samples were then digested at 180°C for 30 minutes. After microwave digestion, the sample solutions were transferred into 15 mL tubes and each digestion tube was rinsed in triplicate with ultra-pure water. The final volume of each sample was 10 mL including the internal standard (Sc, 100 ppb). The samples were analyzed using an Agilent (Santa Clara, CA, USA) 7700X ICP-MS with a PFA inert kit and nebulizer. The concentrations of Si (mass: 28) and Ti (mass: 47) were analyzed in triplicate using  $\text{H}_2$  and He gas modes, respectively. Reagent blanks containing 2 mL  $\text{HNO}_3$  and 200  $\mu$ L HF were prepared simultaneously and analyzed along with the sample. No contamination was found in the reagent blank. To validate the digestion and ICP-MS methodologies, a series of recovery experiments were performed using commercially purchased  $\text{SiO}_2$  and  $\text{TiO}_2$  nanoparticles. For this study, the  $\text{SiO}_2$  and  $\text{TiO}_2$  (0.5-1 mg) standards were digested using the previously defined experimental conditions. The final recovery rates of both Si and Ti were in excess of 90% ( $n = 3$ ). (*Caution: all concentrated acids should be handled in fume hood. Microwave acid digestion procedures are followed the manufacturer safety recommendations.*) Based on the product labeling, unexpected Si and Ti compounds are included in DS-1, DS-2, DS-4, and DS-5. As we know, commercial products contain many other ingredients. It was not clearly determined where the Si came from. However, in our study,  $\text{SiO}_2$  nanoparticles in DS-1 and DS-5 were not found.
